# Supplementary material for: Efficacy of povidone-iodine nasal rinse and mouth wash in COVID-19 management: a prospective, randomized pilot clinical trial (povidone-iodine in COVID-19 management)
Source: BMC Infect Dis. 2024 Mar 1;24:271. doi: 10.1186/s12879-024-09137-y (PMC10905910; doi:10.1186/s12879-024-09137-y)
Supplement: Supplementary file 1 — Supplementary Material 1 [file 12879_2024_9137_MOESM1_ESM.xlsx]

## Sheet: Sheet1
Arm	Positive swab days	SNOT0	SNOT12	SNOT18	WURS0	WURS2	WURS4	WURS6	WURS8	WURS10	WURS12	WURS18	Swab 1 (Positive or negative)	Swab 2 (Positive or negative)	Swab 3 (Positive or negative)	Swab 4 (Positive or negative)	Viral load (Day 0)	Viral load (Swab 1)	Viral load (Swab 2)
2	6	13	10	7	10	19	19	3	3	1	1	0	1	1	1	1	14	0	0
2	6	28	0	0	10	2	2	2	1	1	0	0	1	1	1	1		0	0
1	9	4	4	7	8	5	3	0	0	0	1	0	2	1	1	1	27	22	0
3	11	10	0	0	14	3	0	0	0	0	0	0	2	1	1	1	24	38	0
2	15	44	2	10	58	19	17	4	4	1	5	4	2	2	1	1	30	25	29
1	8	20	31	15	37	20	8	7	2	4	3	7	2	1	1	2	22	23	0
3	12	46	49	32	32	15	10	8	11	10	11	9	2	2	1	1	24	22	37
2	17	20	17	21	19	17	11	14	10	8	5	9	2	2	2	1	21	21	34
3	15	40	42	10		31						3	2	1	1	1	35	26	0
3	12	37	6	11	33	17	10	4	4	0	2	2	2	1	1	1	21	32	0
3	11	11	1	0	12	9	0	1	0	0	0	0	2	1	1	1	25	25	0
3	14	18	8	1	13	8	3	2	3	0	0	0	2	2	1	1	18	23	27
3	13	17	4	0	39	6	10	4	0	0	1	1	2	2	1	1	31	31	27
2	12	36	17	0	39	36	14	6	1	15	12	0	2	2	1	1	31	23	34
2	12	38	16	6	41	10	11	1	7	16	3	0	2	2	1	1	21	21	30
3	12	34	10		24	2	1	0	0	0			2	2			21	27	34
1		30			41	28	1	0	0	0			1				24	0
3		15			7	2	1	2					2				32	18
1	11	28	37	2	37	20	6	2	1	4	3	1	2	1	1	1	23	29	23
1	11	7	12	8	6	2	1	1	0		0	1	2	1	1	1	18	23
